# Supplementary material for: Design and Synthesis of Novel Peptides to Protect Ferulic Acid against Ultraviolet Radiation Based on Domain Site IIA of Bovine Serum Albumin
Source: MDPI journal article supplement (doi:10.3390/biom11091285), 2021-08-27
Supplement: s1 [file s1]

## Supporting information

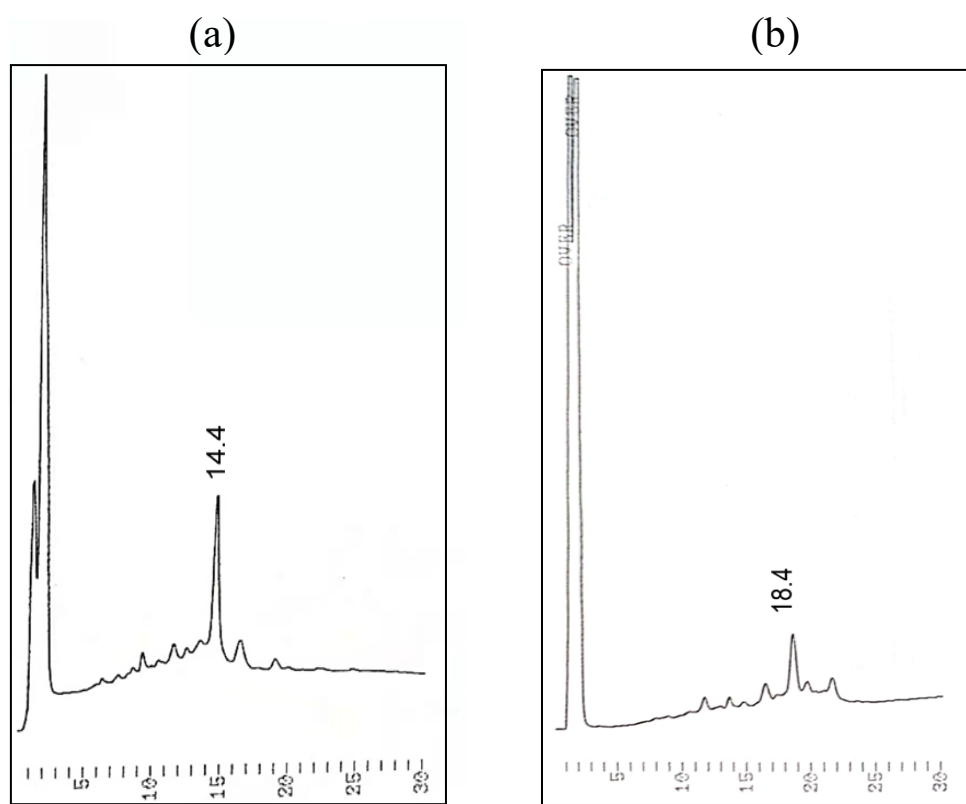

**Figure S1 HPLC chart of the protected sidechain [LW2] and [CW2]. Column: Chromolith® performance, RP-18e (4.6 × 100 mm), Flow Rate: 1.300 mL/min, Eluent: 50– 100 % B in 30 min, Solvent A: 0.1% TFA in H<sub>2</sub>O Solvent B: 0.1% TFA in CH<sub>3</sub>CN, Detect: UV 220 nm. (a) protected sidechain linear [LW2] a retention time, RT= 14.4 min; (b) protected sidechain cyclic [CW2] a retention time, RT=18.4 min.**

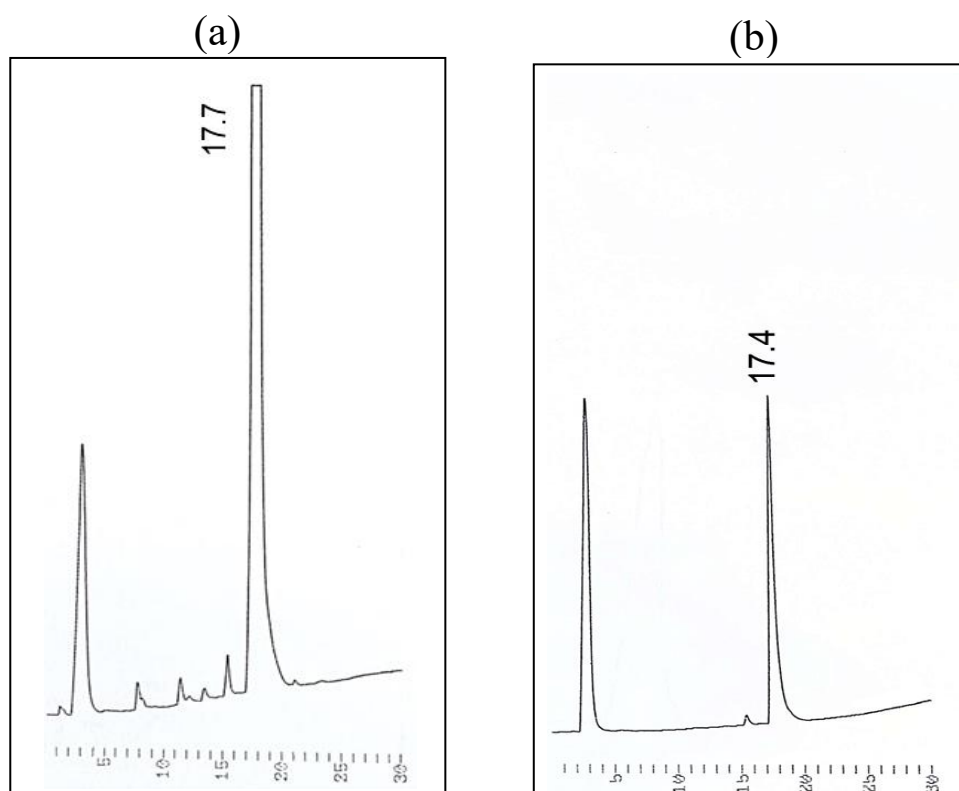

**Figure S2 HPLC trace analysis of the deprotected sidechain [LW2] and [CW2]. Column: Chromolith® performance, RP-18e (4.6 × 100 mm), Flow Rate: 1.300 mL/min, Eluent: 0 – 100 % B in 30 min, Solvent A: 0.1% TFA in H<sub>2</sub>O Solvent B: 0.1% TFA in CH<sub>3</sub>CN, Detect: UV 220 nm. (a) HPLC trace analysis of [LW2] a retention time, RT= 17.7min; (b) HPLC trace analysis of [CW2] a retention time, RT= 17.4min.**

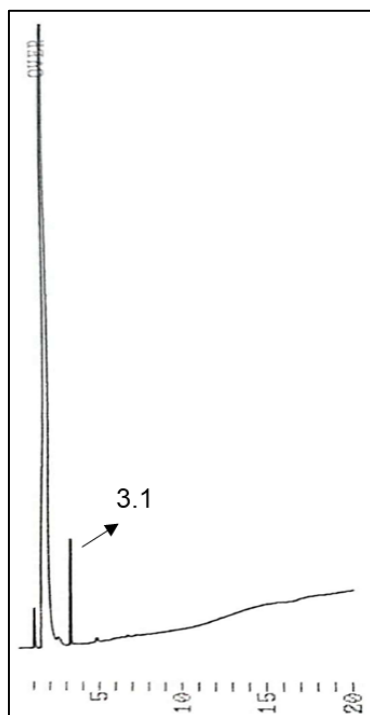

**Figure S3 HPLC trace analysis of the pure cyclic deprotected CEG using solvent B gradient of 0-100%. RT= 3.1 min. Column: Chromolith performance, RP-18e (4.6 × 100 mm), Flow Rate: 2.000 mL/min, Eluent: 0 – 100 % B in 15 min, Solvent A: 0.1% TFA in H<sub>2</sub>O Solvent B: 0.1% TFA in CH<sub>3</sub>CN, Detect: UV 220 nm**

**Figure S4 Mass spectra of thesis peptides. Identification of the synthesized compound was done by Fast Atom Bombardment (FAB) + mass spectroscopy (a, b, c) and Electrospray Ionization Time-of-Flight (ESI-TOF) mass spectrometry (d) for the determination of the molecular weight of the compound.**

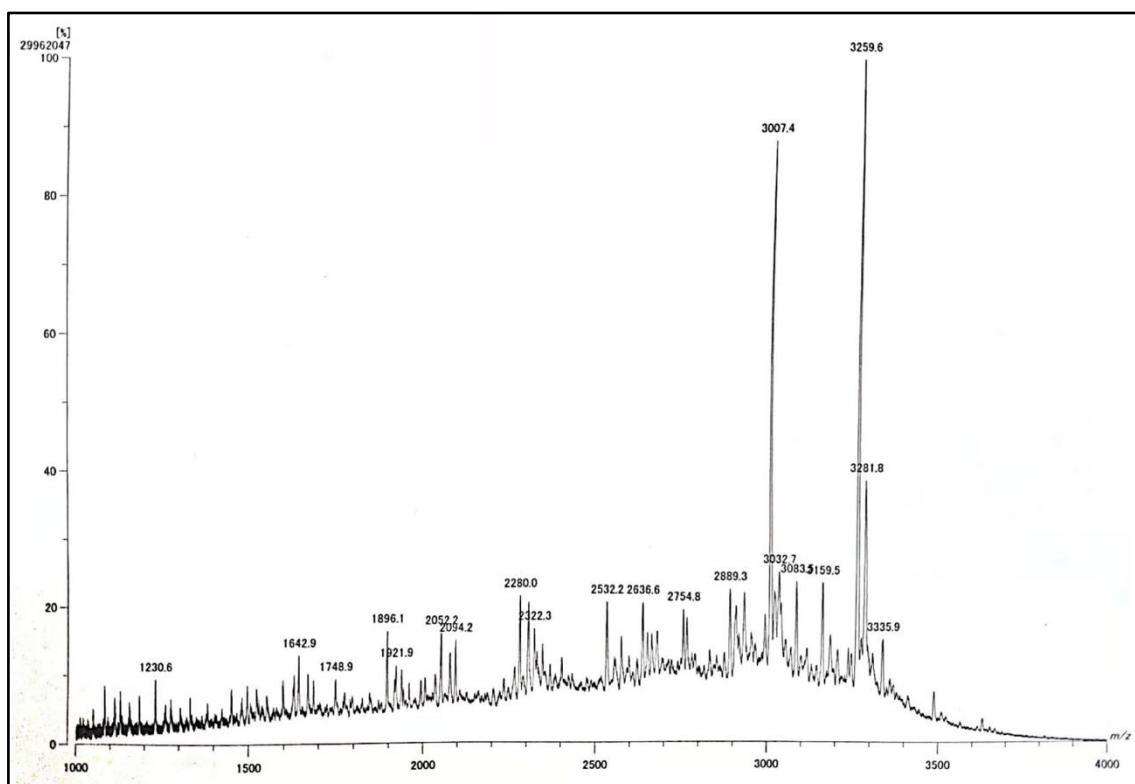

(a) FAB<sup>+</sup> Mass spectrum of protected LW2 [M+3H]<sup>+</sup>

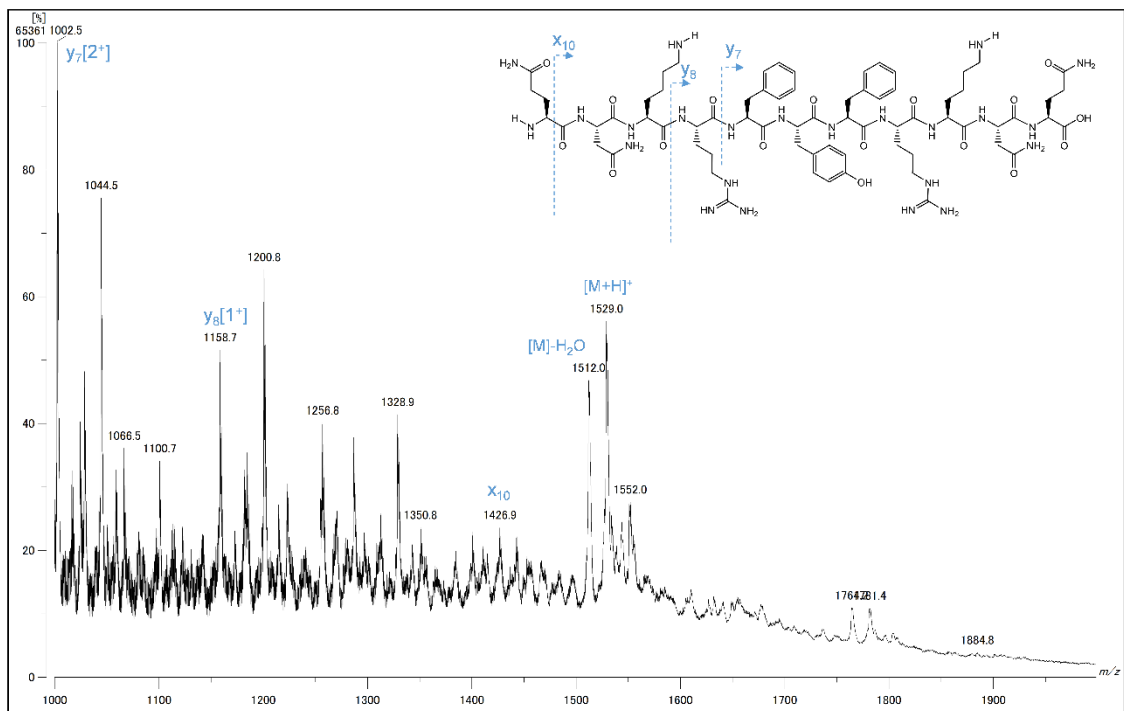

(i)

|                                                              |        |                |                         |
|--------------------------------------------------------------|--------|----------------|-------------------------|
| Inlet: Direct                                                |        | Ion Mode: FAB+ |                         |
| RT: 3.26 min                                                 |        | Scan#: 27      |                         |
| Elements: 12C 69/0, 13C 0/0, H 106/106, N 23/23, O 17/17     |        |                |                         |
| Mass Tolerance : 1000ppm, 5mmu if m/z < 5, 50mmu if m/z > 50 |        |                |                         |
| Unsaturation (U.S.): -0.5 - 50.0                             |        |                |                         |
| Observed m/z                                                 | Int%   | Err[ppm / mmu] | U.S. Composition        |
| 1 1528.8122                                                  | 100.00 | -1.0 / -1.5    | 28.5 12C69 H106 N23 O17 |

(ii)

(b) FAB<sup>+</sup> Mass spectrum of LW2 [M+H]<sup>+</sup>, (i) FAB<sup>+</sup> Mass fragmentation pattern of LW2, (ii) FAB<sup>+</sup> Mass data of LW2.

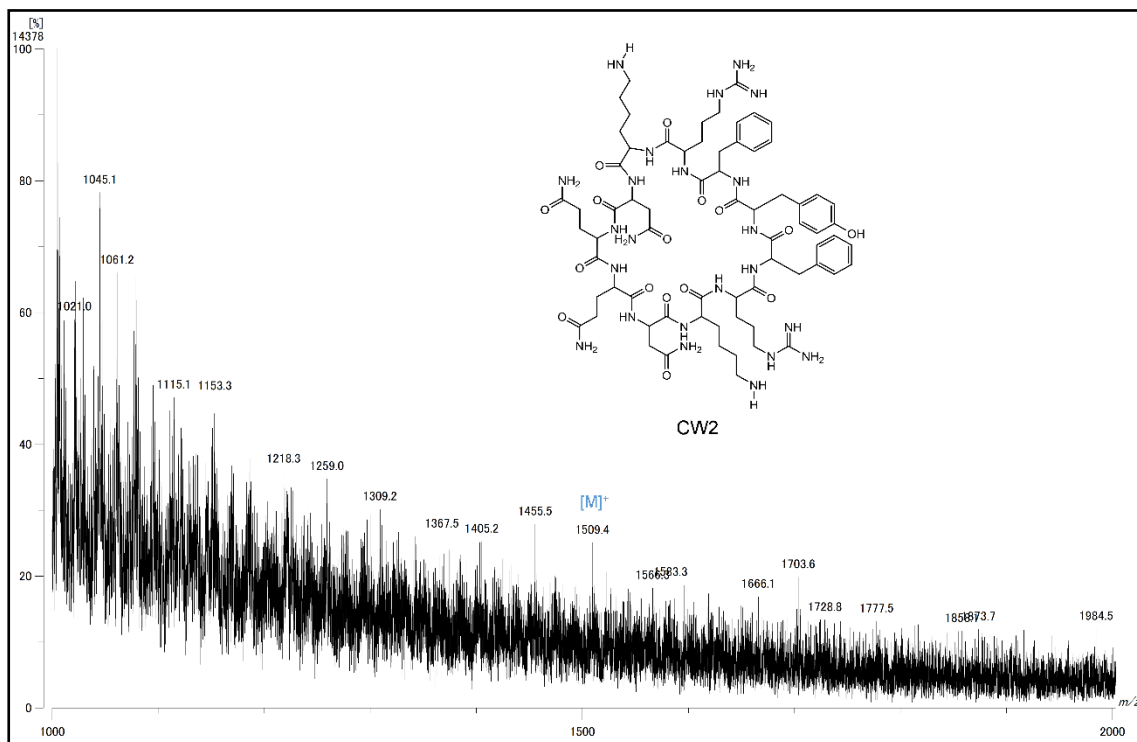

(c)FAB<sup>+</sup> Mass spectrum of CW2 [M]<sup>+</sup>

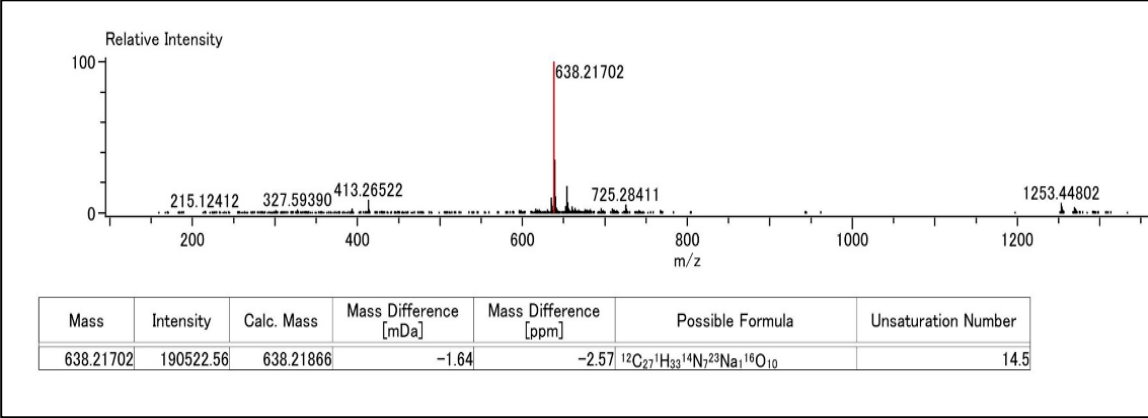

(d)ESI-TOF Mass spectrum of CEG  $[M+Na]^+$

**Table S1 The score of molecule docking between BSA/CW2 and FA.**

| Name | S-Score | Rmsd-Refine | E-Refine |
|------|---------|-------------|----------|
| BSA  | -8.3599 | 1.6010      | -24.5977 |
| CW2  | -4.2035 | 1.9949      | -16.4607 |



**Table S2 Yield and purity for synthesized compounds.**

| Peptide Name | Yield (%) | Chromatographic Purity (%) |
|--------------|-----------|----------------------------|
| LW2          | 97.02     | 97.4                       |
| CW2          | 50.24     | 98.3                       |
| CEG          | 45.86     | >99.0                      |
